# Supplementary material for: Mild organosolv pretreatment of sugarcane bagasse with acetone/phenoxyethanol/water for enhanced sugar production
Source: Royal Society of Chemistry journal article supplement (doi:10.1039/d2gc04404h), 2023-01-01
Supplement: d2gc04404h1.pdf [file d2gc04404h1.pdf]

## Supporting information

### **Mild organosolv pretreatment of sugarcane bagasse with acetone/phenoxyethanol/water for enhanced sugar production**

Wuhuan Li<sup>a,b</sup>, Xuesong Tan<sup>b\*</sup>, Changlin Miao<sup>b</sup>, Zhanying Zhang<sup>c</sup>, Yunxuan Wang<sup>d</sup>, Arthur J. Ragauskas<sup>d,e,f</sup>, Xinshu Zhuang<sup>a,b\*</sup>

<sup>a</sup>School of Energy Science and Engineering, University of Science and Technology of China, Hefei 230026, PR China

<sup>b</sup>Guangzhou Institute of Energy Conversion, Chinese Academy of Sciences, CAS Key Laboratory of Renewable Energy, Guangdong Provincial Key Laboratory of New and Renewable Energy Research and Development, Guangzhou 510640, PR China

<sup>c</sup>School of Mechanical, Medical and Process Engineering, Faculty of Engineering; Centre for Agriculture and the Bioeconomy, Faculty of Science, Queensland University of Technology, Brisbane, Queensland 4000, Australia

<sup>d</sup>Department of Chemical and Biomolecular Engineering, University of Tennessee - Knoxville, Knoxville, TN, USA.

<sup>e</sup>Joint Institute for Biological Science, Biosciences Division, Oak Ridge National Laboratory, Oak Ridge, TN, USA.

<sup>f</sup>Center of Renewable Carbon, Department of Forestry, Wildlife, and Fisheries, University of Tennessee Institute of Agriculture, Knoxville, TN, USA.

\* Corresponding author:

E-mail address: [zhuangxs@ms.giec.ac.cn](mailto:zhuangxs@ms.giec.ac.cn), [tanxs@ms.giec.ac.cn](mailto:tanxs@ms.giec.ac.cn),

## **List of supporting information**

**Figure S1** SEM images of raw biomass (SCB) and residues

**Figure S2** FTIR of raw biomass and residues ( $\text{LOI}=\text{A}1430\text{cm}^{-1}/\text{A}898\text{cm}^{-1}$ )

**Figure S3** XRD of raw biomass and residues

**Figure S4** Quantitative  $^{31}\text{P}$  NMR spectrum of MWL and APWL derivatized with TMDP using cyclohexanol as internal standard

**Table S1** Four-fraction Box-Behnken design

**Table S2** Variance analysis of the quadratic model

**Table S3** Comparison of treatment with APW to that with other organosolv solvents

**Table S4** The assignment of peaks in 2D HSQC spectra of MWL and APWL

**Table S5** Hydroxyl group contents of MWL and APWL as determined by  $^{31}\text{P}$  NMR analysis

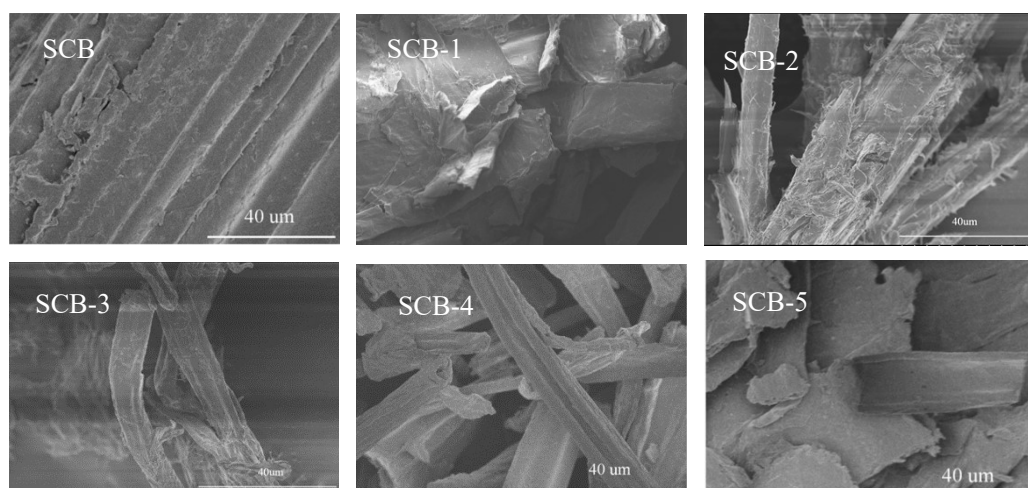

**Figure S1** SEM images of raw biomass (SCB) and residues (SCB-1, 125 °C - 120 min - 0.17 M H<sub>2</sub>SO<sub>4</sub> - LSR15; SCB-2, 110 °C - 120 min - 0.15 M H<sub>2</sub>SO<sub>4</sub> - LSR10; SCB-3, 110 °C - 110 min - 0.1 M H<sub>2</sub>SO<sub>4</sub> - LSR10; SCB-4, 110 °C - 80 min - 0.2 M H<sub>2</sub>SO<sub>4</sub> - LSR10; SCB-5, 110 °C - 90 min - 0.15 M H<sub>2</sub>SO<sub>4</sub> - LSR10).

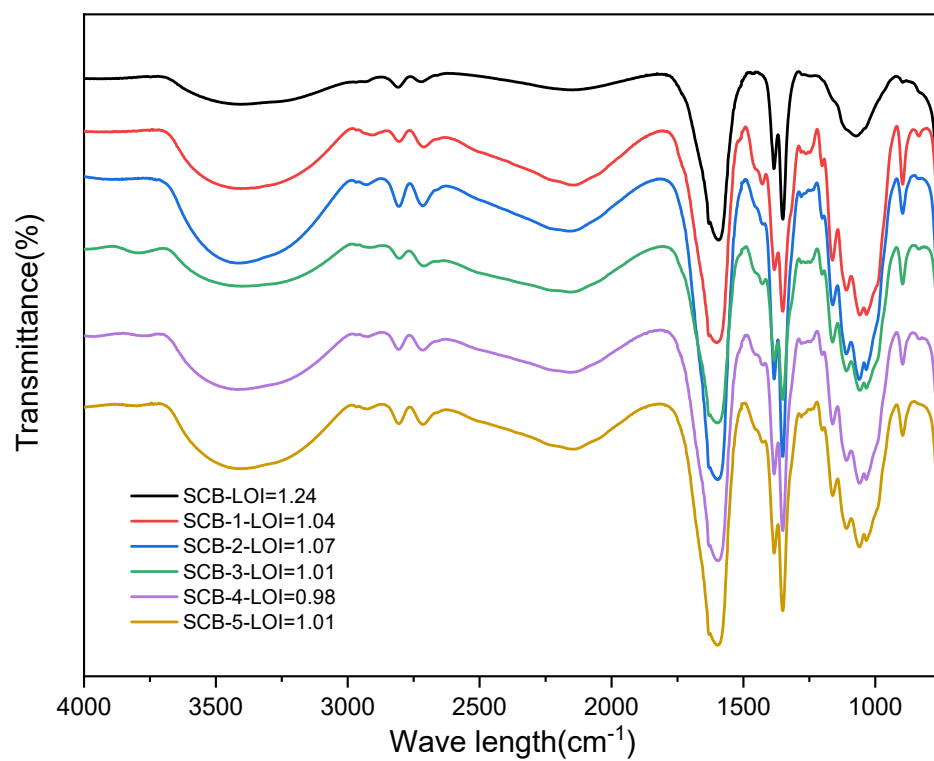

**Figure S2** FTIR of raw biomass and residues (LOI=A1430cm-1/A898cm-1)

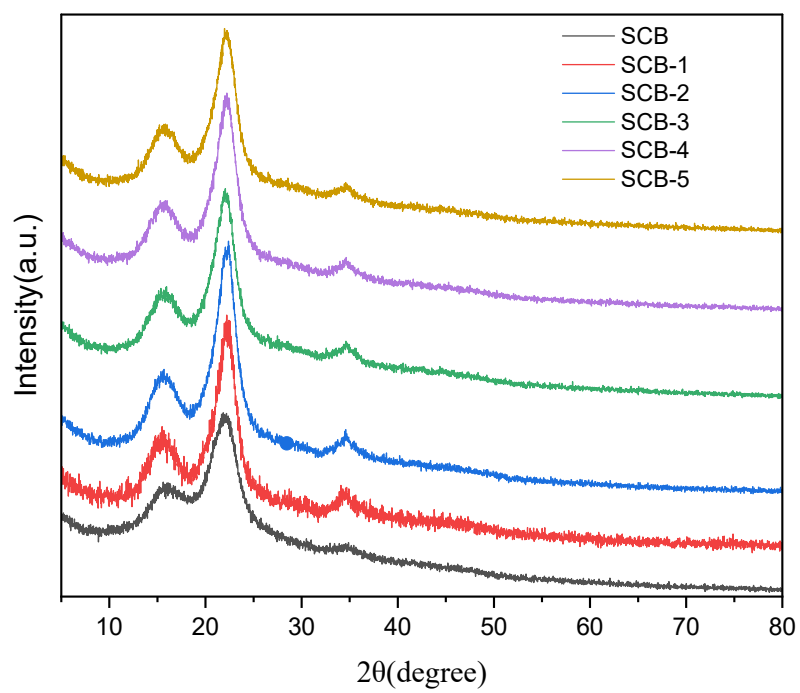

**Figure S3** XRD of raw biomass and residues

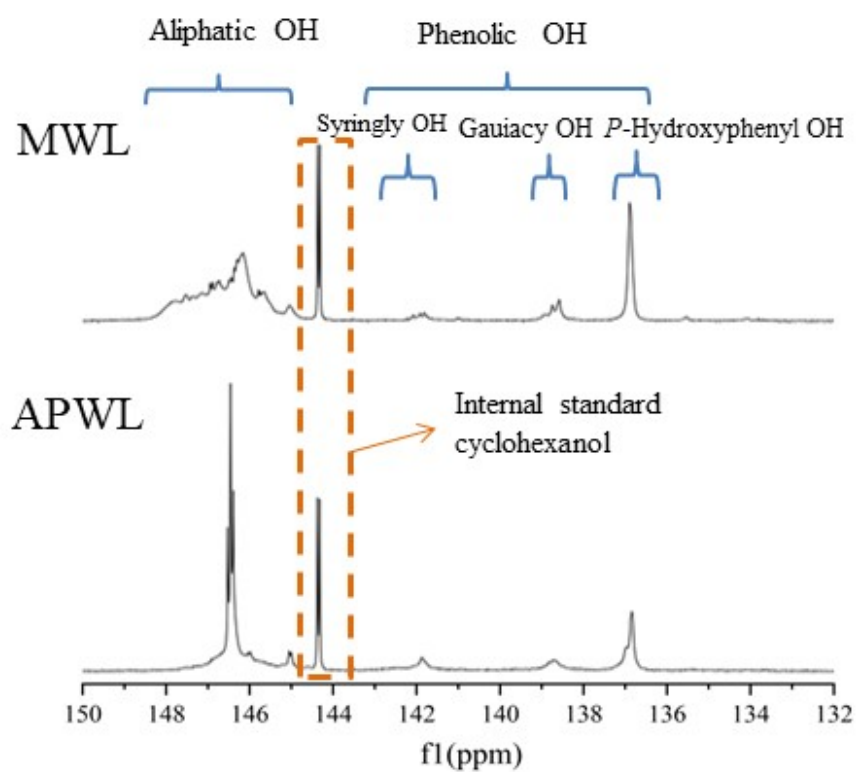

**Figure S4** Quantitative  $^{31}\text{P}$  NMR spectrum of MWL and APWL derivatized with TMDP using cyclohexanol as internal standard

**Table S1** Four-fraction Box-Behnken design

| Symbol         | Variable                           | Coding level |       |     |
|----------------|------------------------------------|--------------|-------|-----|
|                |                                    | -1           | 0     | 1   |
| X <sub>1</sub> | Time, min                          | 30           | 75    | 120 |
| X <sub>2</sub> | Temperature, °C                    | 80           | 105   | 130 |
| X <sub>3</sub> | H <sub>2</sub> SO <sub>4</sub> , M | 0.05         | 0.175 | 0.3 |
| X <sub>4</sub> | L:S                                | 10           | 15    | 20  |

**Table S2** Variance analysis of the quadratic model

| Source                        | Sum of squares | df | Mean square | F value | p-value<br>Prob>F | Remarks     |
|-------------------------------|----------------|----|-------------|---------|-------------------|-------------|
| Model                         | 18158.1        | 14 | 1297        | 22.52   | 0.000             | significant |
| X <sub>1</sub>                | 1657.5         | 1  | 1657.5      | 28.78   | 0.000             | significant |
| X <sub>2</sub>                | 11660.1        | 1  | 11660.1     | 202.46  | 0.000             | significant |
| X <sub>3</sub>                | 2167.9         | 1  | 2167.9      | 37.64   | 0.000             | significant |
| X <sub>4</sub>                | 5.7            | 1  | 5.7         | 0.1     | 0.758             |             |
| X <sub>1</sub> <sup>2</sup>   | 90.6           | 1  | 90.6        | 1.57    | 0.230             |             |
| X <sub>2</sub> <sup>2</sup>   | 1955.3         | 1  | 1955.3      | 33.95   | 0.000             | significant |
| X <sub>3</sub> <sup>2</sup>   | 440.0          | 1  | 440.0       | 7.64    | 0.015             |             |
| X <sub>4</sub> <sup>2</sup>   | 105.7          | 1  | 105.7       | 1.84    | 0.197             |             |
| X <sub>1</sub> X <sub>2</sub> | 49.8           | 1  | 49.8        | 0.87    | 0.368             |             |
| X <sub>1</sub> X <sub>3</sub> | 281.4          | 1  | 281.4       | 4.89    | 0.044             |             |
| X <sub>1</sub> X <sub>4</sub> | 14.9           | 1  | 14.9        | 0.26    | 0.619             |             |
| X <sub>2</sub> X <sub>3</sub> | 164.0          | 1  | 164.0       | 2.85    | 0.114             |             |
| X <sub>2</sub> X <sub>4</sub> | 22.3           | 1  | 22.3        | 0.39    | 0.544             |             |
| X <sub>3</sub> X <sub>4</sub> | 13.7           | 1  | 13.7        | 0.24    | 0.634             |             |
| Residual                      | 806.3          | 14 | 57.6        |         |                   |             |
| Lack of fit                   | 792.3          | 10 | 79.2        | 22.65   | 0.004             |             |
| Pure error                    | 14.0           | 4  | 3.5         |         |                   |             |
| Cor Total                     | 18964.4        | 28 |             |         |                   |             |



**Table S3** Comparison of treatment with APW to that with other organosolv solvents

| Plant species     | Pretreatment conditions                                                          | Lignin removal rate | Reference  |
|-------------------|----------------------------------------------------------------------------------|---------------------|------------|
| Sugarcane bagasse | APW, 0.2 M H <sub>2</sub> SO <sub>4</sub> ,<br>110 °C, 80min,                    | 94.94%              | This study |
| Sugarcane bagasse | 50% ethanol + BHT, 20% H <sub>2</sub> SO <sub>4</sub> ,<br>120°C, 30min          | 72.45%              | [1]        |
| Sugarcane bagasse | Water/1-butanol (4.0mol/mol),<br>200°C,                                          | 67%                 | [2]        |
| Rice straw        | 70% EPH:30%H <sub>2</sub> O, 0.05M H <sub>2</sub> SO <sub>4</sub> ,<br>130°C, 2h | 63.16%              | [3]        |
| Corn cob          | 60 % pentanol, 160 °C, 60 min                                                    | 85%                 | [4]        |

## Reference

- [1] A. A. Schmatz and M. Brienza, *BioEnergy Research*, 2021, 15, 166-174.
- [2] Y. Kawamata, T. Yoshikawa, Y. Koyama, H. Ishimaru, S. Ohtsuki, E. Fumoto, S. Sato, Y. Nakasaka and T. Masuda, *Industrial Crops and Products*, 2021, 159.113078.
- [3] Q. Zhang, Y. Deng, X. Tan, W. Wang, Q. Yu, X. Chen, C. Miao, Y. Guo, Y. Zhang, X. Zhuang and Z. Yuan, *Industrial Crops and Products*, 2020, 145.112091.
- [4] M. Madadi, Zahoor, G. J. Song, K. Karimi, D. C. Zhu, M. Elsayed, F. B. Sun and A. Abomohra, *Bioresource Technology*, 2022, 359.127503.

**Table S4** The assignment of peaks in 2D HSQC spectra of MWL and APWL

| Label                             | $\delta_C/\delta_H(\text{ppm})$ |             | Assignment                                                                       |
|-----------------------------------|---------------------------------|-------------|----------------------------------------------------------------------------------|
|                                   | MWL                             | APWL        |                                                                                  |
| B' <sub>β</sub>                   | 50.49/2.62                      | ND          | C <sub>β</sub> -H <sub>β</sub> in β-β tetrahydrofuran (B')                       |
| B <sub>β</sub>                    | 53.36/3.71                      | 54.25/3.69  | C <sub>β</sub> -H <sub>β</sub> in β-β tetrahydrofuran (B')                       |
| OCH <sub>3</sub>                  | 55.44/3.74                      | 56.22/3.67  | C-H in methoxyl                                                                  |
| A <sub>γ</sub>                    | 60.14/3.57                      | ND          | C <sub>γ</sub> -H <sub>γ</sub> in β-O-4 substructures (A)                        |
| B <sub>γ</sub>                    | 66.16/3.76                      | 71.77/4.20  | C <sub>γ</sub> -H <sub>γ</sub> in phenylcoumaran substructures (B)               |
| A' <sub>γ</sub>                   | 63.95/4.27                      | ND          | C <sub>γ</sub> -H <sub>γ</sub> in γ-acylated β-O-4 (A')                          |
| B <sub>γ</sub>                    | 71.77/4.19                      | 69.75/3.97  | C <sub>γ</sub> -H <sub>γ</sub> in β-β resinol (B)                                |
| Glc <sub>5</sub>                  | 71.47/3.51                      | ND          | C <sub>5</sub> -H <sub>5</sub> in cellulose                                      |
| A <sub>α</sub>                    | 72.35/4.85                      | ND          | C <sub>α</sub> -H <sub>α</sub> in β-O-4 substructures (A)                        |
| X <sub>2</sub>                    | 72.71/3.21                      | ND          | C <sub>2</sub> -H <sub>2</sub> in β-D-xylopyranoside (X)                         |
| B' <sub>α</sub>                   | 83.57/4.97                      | ND          | C <sub>α</sub> -H <sub>α</sub> in β-β (B', tetrahydrofuran)                      |
| B <sub>α</sub>                    | 85.08/4.69                      | 82.13/4.88  | C <sub>α</sub> -H <sub>α</sub> in β-β resinol (B)                                |
| X <sub>3</sub>                    | 74.94/3.25                      | ND          | C <sub>3</sub> -H <sub>3</sub> in β-D-xylopyranoside (X)                         |
| X <sub>4</sub>                    | 76.14/3.53                      | ND          | C <sub>4</sub> -H <sub>4</sub> in xylan substructures (X)                        |
| A <sub>β</sub> (G)                | 83.27/4.41                      | ND          | C <sub>β</sub> -H <sub>β</sub> in β-O-4 substructures linked to G (A)            |
| A <sub>β</sub> (S)                | 86.38/4.13                      | ND          | C <sub>β</sub> -H <sub>β</sub> in β-O-4 substructures linked to a S unit (A)     |
| T <sub>6</sub>                    | 94.75/6.60                      | ND          | C' <sub>2,6</sub> -H' <sub>2,6</sub> in triclin (T)                              |
| T <sub>8</sub>                    | 99.38/6.25                      | ND          | C <sub>2,6</sub> -H <sub>2,6</sub> in triclin (T)                                |
| T <sub>3</sub>                    | 105.45/7.05                     | ND          | C <sub>8</sub> -H <sub>8</sub> in triclin (T)                                    |
| S <sub>2,6</sub>                  | 104.53/6.72                     | 105.96/6.62 | C <sub>2,6</sub> -H <sub>2,6</sub> in syringyl units (S)                         |
| S' <sub>2,6</sub>                 | 107.13/7.34                     | 106.76/7.32 | C <sub>2,6</sub> -H <sub>2,6</sub> in oxidized S units (S')                      |
| T' <sub>2,6</sub>                 | 106.49/7.30                     | ND          | C' <sub>2,6</sub> -H' <sub>2,6</sub> in triclin (T)                              |
| G <sub>2</sub>                    | 111.64/7.0                      | ND          | C <sub>2</sub> -H <sub>2</sub> in guaiacyl units (G)                             |
| FA <sub>2</sub>                   | 112.02/7.35                     | 111.89/7.32 | C <sub>2</sub> -H <sub>2</sub> in ferulic acid (FA)                              |
| pCE <sub>8</sub>                  | 114.20/6.24                     | 114.59/6.29 | C <sub>8</sub> -H <sub>8</sub> in p-coumarate unites (pCA)                       |
| G <sub>5</sub>                    | 115.47/6.8                      | 114.28/6.76 | C <sub>5</sub> -H <sub>5</sub> in guaiacyl units (G)                             |
| G <sub>6</sub>                    | 119.72/6.84                     | 120.84/6.81 | C <sub>6</sub> -H <sub>6</sub> in guaiacyl units (G)                             |
| H <sub>2,6</sub>                  | 128.51/7.18                     | 129.65/7.16 | C <sub>2,6</sub> -H <sub>2,6</sub> in p-hydroxyphenyl units (H)                  |
| pCE <sub>2,6</sub>                | 130.48/7.46                     | 130.06/7.45 | C <sub>2,6</sub> -H <sub>2,6</sub> in p-coumaric acid (pCA)                      |
| pCE <sub>7</sub> /FA <sub>7</sub> | 145.31/7.41                     | 145.08/7.44 | C <sub>7</sub> -H <sub>7</sub> in p-coumarate unites (pCA) / ferulate units (FA) |

**Table S5** Hydroxyl group contents of MWL and APWL as determined by <sup>31</sup>P NMR analysis

| Lignin sample | Aliphatic OH<br>mmol/g | Phenolic OH, mmol/g |          |                     | COOH<br>mmol/g |
|---------------|------------------------|---------------------|----------|---------------------|----------------|
|               |                        | Syringyl            | Guaiacyl | p-hydroxy<br>phenyl |                |
| MWL           | 8.60                   | 0.18                | 0.53     | 1.70                | ND             |
| APWL          | 6.12                   | 0.52                | 0.66     | 1.86                | ND             |
